# Supplementary material for: Solid-state transformation of the MOF [Ni2(bipy)1.5(PDC)2(H2O)2]·3.5H2O
Source: Royal Society of Chemistry journal article supplement (doi:10.1039/c1ce05594a), 2011-01-01
Supplement: c1ce05594a.pdf [file c1ce05594a.pdf]

### Supporting Information Available

**Table S1.-** Distances (Å) between O atoms connected via H bonds for NiPB5.5, calculated by PLATON program.<sup>(i)</sup>

|       | O(1W)     | O(2W) | O(3W)     | O(4W)                  | O(5W)                  | O3        | O6       | O8       | O10       |
|-------|-----------|-------|-----------|------------------------|------------------------|-----------|----------|----------|-----------|
| O(1W) |           |       |           | 2.752(17)              |                        | 2.907(8)  |          | 2.869(6) |           |
| O(2W) |           |       |           |                        |                        |           | 2.775(6) | 2.765(8) | 2.762(7)  |
| O(3W) |           |       |           |                        | 2.928(17)              | 3.000(15) |          |          | 3.297(11) |
| O(4W) | 2.752(17) |       |           |                        | 2.954(18)<br>2.768(21) |           |          |          |           |
| O(5W) |           |       | 2.928(17) | 2.954(18)<br>2.768(21) |                        |           |          |          |           |

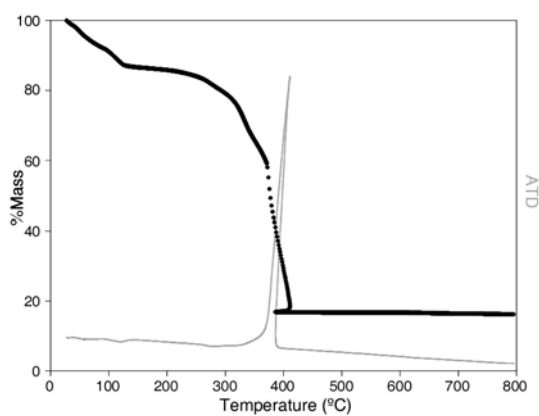

**Figure S1.-** TG diagram for NiPB5.5.

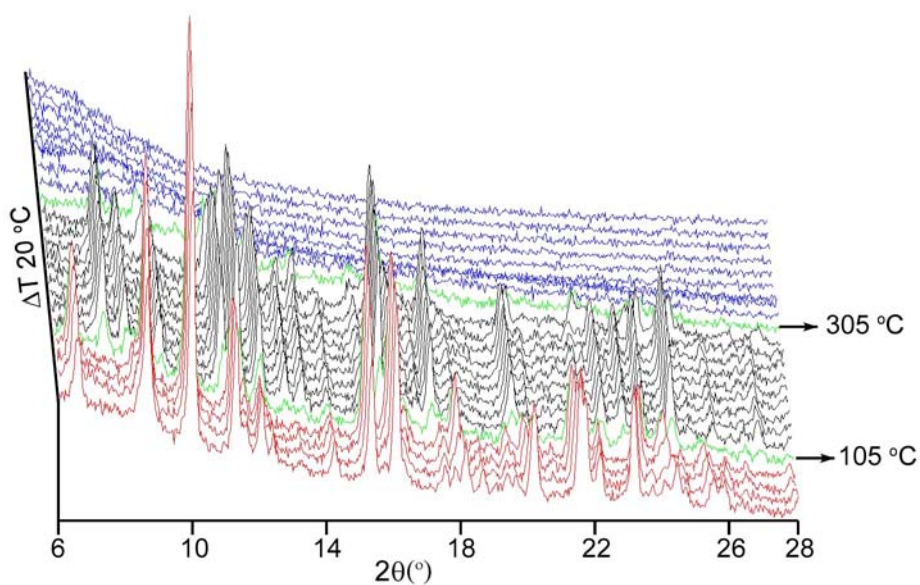

**Figure S2.-** TDX diagrams for NiPB5.5 from 25°C to 450°C at steps of 20°C.

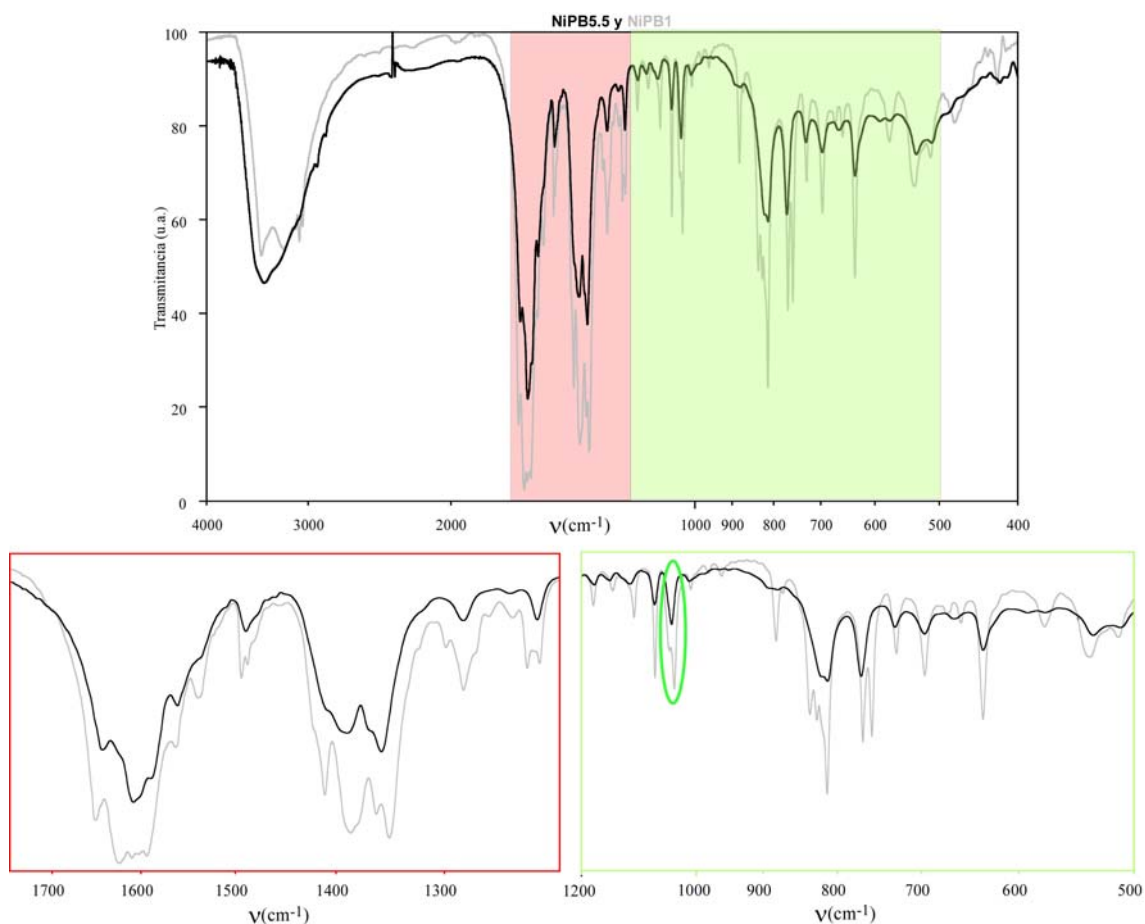

**Figure S3.-** IR spectra for NiPB5.5 and NiPB1. Pink zone corresponds to carboxylate groups. Green zone has been marked as it is the most significant for these compounds. Green circle is the carboxylate band. This band is split for NiPB1 because of the new metal-carboxylate bond.

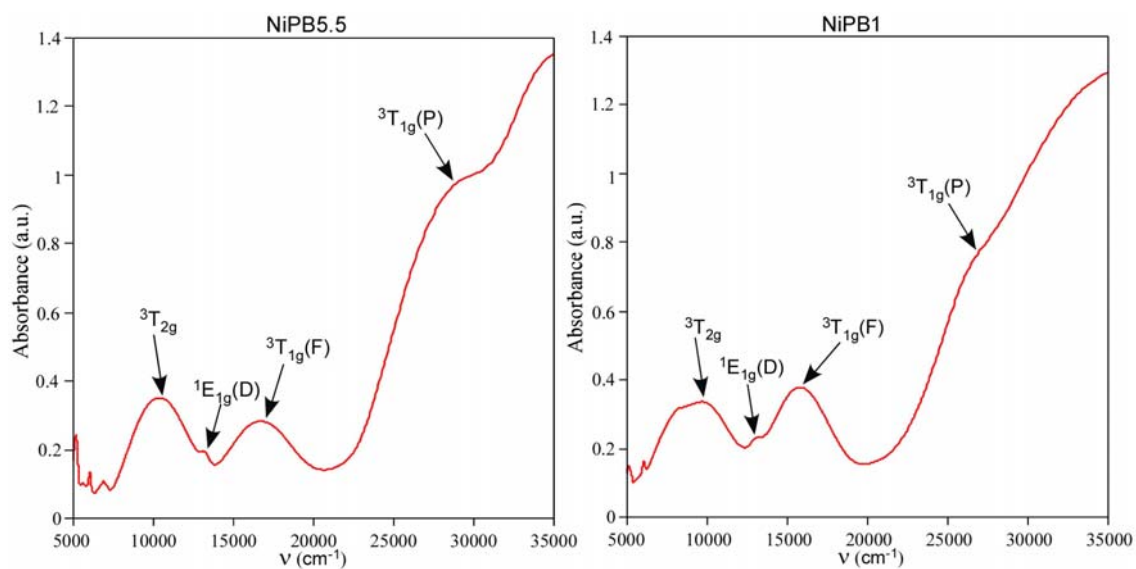

**Figure S4.-** UV-Vis spectra for NiPB5.5 (right) and NiPB1 (left).

**Table S2.-** Distances (Å) between O atoms connected via H bonds for NiPB1

|       | O(2)    | O(3)    | O(6)    | O(8)    | O(10)   |
|-------|---------|---------|---------|---------|---------|
| O(2)  |         |         |         |         | 2.66(3) |
| O(3)  |         |         | 2.85(5) |         |         |
| O(6)  |         | 2.85(5) |         | 2.79(6) |         |
| O(8)  |         |         | 2.79(6) |         |         |
| O(10) | 2.66(3) |         |         |         |         |

**Table S3.-** Fractional atomic coordinates and isotropic or equivalent isotropic displacement parameters (Å<sup>2</sup>) for NiPB5.5.

| Átomo | x            | y            | z            | U <sub>eq</sub> , Å <sup>2</sup> | Occ(<1) |
|-------|--------------|--------------|--------------|----------------------------------|---------|
| Ni1   | -0.27580 (7) | -0.30598 (8) | -0.22185 (5) | 0.0131 (3)                       |         |
| Ni2   | 0.07255 (7)  | -0.03851 (8) | -0.09494 (5) | 0.0136 (3)                       |         |
| N1    | -0.2779 (4)  | -0.3495 (5)  | -0.1296 (3)  | 0.0160 (6)                       |         |
| N2    | -0.2821 (5)  | -0.2467 (5)  | 0.1870 (3)   | 0.0160 (6)                       |         |
| N3    | -0.3308 (4)  | -0.1465 (5)  | -0.2100 (3)  | 0.0147 (5)                       |         |
| N4    | 0.2286 (4)   | -0.0079 (5)  | -0.0626 (3)  | 0.0203 (9)                       |         |
| N5    | 0.0826 (4)   | -0.1970 (5)  | -0.1327 (3)  | 0.0196 (5)                       |         |
| O1    | -0.1408 (3)  | -0.2207 (4)  | -0.1704 (2)  | 0.0147 (5)                       |         |
| O2    | -0.0779 (3)  | -0.0513 (4)  | -0.1197 (2)  | 0.0147 (5)                       |         |
| O1W   | 0.3416 (4)   | -0.1562 (5)  | -0.3807 (3)  | 0.0431 (17)*                     |         |
| O3    | -0.6241 (3)  | -0.0624 (4)  | -0.2499 (2)  | 0.0147 (5)                       |         |
| O2W   | 0.0707 (4)   | -0.4017 (4)  | 0.1213 (2)   | 0.0234 (14)*                     |         |
| O4    | -0.5823 (3)  | 0.1239 (4)   | -0.2270 (2)  | 0.0147 (5)                       |         |
| O4W   | -0.2857 (9)  | -0.7652 (11) | -0.2890 (6)  | 0.072 (4)*                       | 0.5     |
| O5    | 0.0544 (3)   | 0.1139 (4)   | -0.0489 (2)  | 0.0152 (9)                       |         |
| O3W   | 0.4232 (9)   | -0.0761 (12) | -0.4640 (6)  | 0.070 (4)*                       | 0.5     |
| O6    | -0.2038 (3)  | -0.4593 (4)  | -0.2253 (2)  | 0.0152 (9)                       |         |
| O5W   | 0.4075 (10)  | -0.0909 (12) | -0.5938 (7)  | 0.085 (5)*                       | 0.5     |
| O7    | 0.1035 (4)   | -0.1336 (4)  | -0.0098 (2)  | 0.0196 (5)                       |         |
| O8    | 0.1305 (3)   | -0.3148 (4)  | 0.0275 (2)   | 0.0196 (5)                       |         |
| O9    | -0.0284 (3)  | -0.4620 (4)  | -0.3119 (2)  | 0.0196 (5)                       |         |
| O10   | 0.0484 (3)   | -0.3046 (4)  | -0.3240 (2)  | 0.0196 (5)                       |         |
| C1    | -0.1899 (6)  | -0.3589 (6)  | -0.0706 (4)  | 0.0160 (6)                       |         |
| C2    | -0.1894 (6)  | -0.3514 (6)  | -0.0079 (4)  | 0.0160 (6)                       |         |
| C3    | -0.2794 (5)  | -0.3297 (6)  | -0.0028 (4)  | 0.0160 (6)                       |         |
| C4    | -0.3695 (5)  | -0.3261 (6)  | -0.0624 (3)  | 0.0160 (6)                       |         |
| C5    | -0.3674 (6)  | -0.3369 (6)  | -0.1240 (4)  | 0.0160 (6)                       |         |
| C6    | -0.1962 (6)  | -0.2460 (6)  | 0.1796 (4)   | 0.0160 (6)                       |         |
| C7    | -0.1924 (6)  | -0.2767 (6)  | 0.1193 (3)   | 0.0160 (6)                       |         |
| C8    | -0.2810 (5)  | -0.3084 (6)  | 0.0633 (3)   | 0.0160 (6)                       |         |
| C9    | -0.3702 (5)  | -0.3107 (6)  | 0.0711 (4)   | 0.0160 (6)                       |         |
| C10   | -0.3663 (5)  | -0.2810 (6)  | 0.1334 (3)   | 0.0160 (6)                       |         |
| C11   | -0.2556 (5)  | -0.0722 (6)  | -0.1762 (3)  | 0.0147 (5)                       |         |
| C12   | -0.2746 (5)  | 0.0373 (6)   | -0.1598 (3)  | 0.0147 (5)                       |         |
| C13   | -0.3749 (5)  | 0.0696 (6)   | -0.1798 (3)  | 0.0147 (5)                       |         |
| C14   | -0.4512 (5)  | -0.0077 (6)  | -0.2127 (3)  | 0.0147 (5)                       |         |
| C15   | -0.4263 (6)  | -0.1149 (6)  | -0.2292 (4)  | 0.0147 (5)                       |         |
| C16   | -0.5625 (5)  | 0.0208 (7)   | -0.2323 (3)  | 0.0147 (5)                       |         |
| C17   | -0.1494 (6)  | -0.1174 (6)  | -0.1540 (4)  | 0.0147 (5)                       |         |
| C18   | 0.2752 (5)   | -0.0183 (6)  | -0.1029 (4)  | 0.0203 (9)                       |         |
| C19   | 0.3795 (5)   | -0.0158 (6)  | -0.0801 (4)  | 0.0203 (9)                       |         |
| C20   | 0.4428 (5)   | -0.0023 (6)  | -0.0135 (4)  | 0.0203 (9)                       |         |
| C21   | 0.3957 (5)   | 0.0112 (6)   | 0.0280 (4)   | 0.0203 (9)                       |         |
| C22   | 0.2913 (5)   | 0.0091 (6)   | 0.0020 (4)   | 0.0203 (9)                       |         |

|     |            |             |             |            |
|-----|------------|-------------|-------------|------------|
| C23 | 0.0262 (6) | -0.3715 (7) | -0.2883 (4) | 0.0196 (5) |
| C24 | 0.0678 (5) | -0.2285 (7) | -0.1943 (4) | 0.0196 (5) |
| C25 | 0.0567 (5) | -0.3449 (7) | -0.2156 (4) | 0.0196 (5) |
| C26 | 0.0942 (5) | -0.2814 (7) | -0.0868 (4) | 0.0196 (5) |
| C27 | 0.0657 (5) | -0.4274 (7) | -0.1689 (3) | 0.0196 (5) |
| C28 | 0.0883 (5) | -0.3979 (7) | -0.1034 (4) | 0.0196 (5) |
| C29 | 0.1129 (6) | -0.2404 (7) | -0.0177 (4) | 0.0196 (5) |

**Table S4.-** Atomic displacement parameters (Å<sup>2</sup>) for NiPB5.5.

| Átomo | $U^{11}$    | $U^{22}$    | $U^{33}$    | $U^{12}$     | $U^{13}$    | $U^{23}$     |
|-------|-------------|-------------|-------------|--------------|-------------|--------------|
| C1    | 0.0185 (13) | 0.0137 (13) | 0.0167 (16) | -0.0011 (11) | 0.0085 (12) | -0.0044 (12) |
| C2    | 0.0185 (13) | 0.0137 (13) | 0.0167 (16) | -0.0011 (11) | 0.0085 (12) | -0.0044 (12) |
| C3    | 0.0185 (13) | 0.0137 (13) | 0.0167 (16) | -0.0011 (11) | 0.0085 (12) | -0.0044 (12) |
| C4    | 0.0185 (13) | 0.0137 (13) | 0.0167 (16) | -0.0011 (11) | 0.0085 (12) | -0.0044 (12) |
| C5    | 0.0185 (13) | 0.0137 (13) | 0.0167 (16) | -0.0011 (11) | 0.0085 (12) | -0.0044 (12) |
| C6    | 0.0185 (13) | 0.0137 (13) | 0.0167 (16) | -0.0011 (11) | 0.0085 (12) | -0.0044 (12) |
| C7    | 0.0185 (13) | 0.0137 (13) | 0.0167 (16) | -0.0011 (11) | 0.0085 (12) | -0.0044 (12) |
| C8    | 0.0185 (13) | 0.0137 (13) | 0.0167 (16) | -0.0011 (11) | 0.0085 (12) | -0.0044 (12) |
| C9    | 0.0185 (13) | 0.0137 (13) | 0.0167 (16) | -0.0011 (11) | 0.0085 (12) | -0.0044 (12) |
| C10   | 0.0185 (13) | 0.0137 (13) | 0.0167 (16) | -0.0011 (11) | 0.0085 (12) | -0.0044 (12) |
| C11   | 0.0179 (13) | 0.0099 (13) | 0.0175 (12) | -0.0013 (9)  | 0.0089 (11) | -0.0007 (10) |
| C12   | 0.0179 (13) | 0.0099 (13) | 0.0175 (12) | -0.0013 (9)  | 0.0089 (11) | -0.0007 (10) |
| C13   | 0.0179 (13) | 0.0099 (13) | 0.0175 (12) | -0.0013 (9)  | 0.0089 (11) | -0.0007 (10) |
| C14   | 0.0179 (13) | 0.0099 (13) | 0.0175 (12) | -0.0013 (9)  | 0.0089 (11) | -0.0007 (10) |
| C15   | 0.0179 (13) | 0.0099 (13) | 0.0175 (12) | -0.0013 (9)  | 0.0089 (11) | -0.0007 (10) |
| C16   | 0.0179 (13) | 0.0099 (13) | 0.0175 (12) | -0.0013 (9)  | 0.0089 (11) | -0.0007 (10) |
| C17   | 0.0179 (13) | 0.0099 (13) | 0.0175 (12) | -0.0013 (9)  | 0.0089 (11) | -0.0007 (10) |
| C18   | 0.0136 (19) | 0.034 (2)   | 0.0111 (17) | -0.0037 (17) | 0.0031 (15) | -0.0028 (17) |
| C19   | 0.0136 (19) | 0.034 (2)   | 0.0111 (17) | -0.0037 (17) | 0.0031 (15) | -0.0028 (17) |
| C20   | 0.0136 (19) | 0.034 (2)   | 0.0111 (17) | -0.0037 (17) | 0.0031 (15) | -0.0028 (17) |
| C21   | 0.0136 (19) | 0.034 (2)   | 0.0111 (17) | -0.0037 (17) | 0.0031 (15) | -0.0028 (17) |
| C22   | 0.0136 (19) | 0.034 (2)   | 0.0111 (17) | -0.0037 (17) | 0.0031 (15) | -0.0028 (17) |
| C23   | 0.0272 (12) | 0.0184 (13) | 0.0165 (13) | 0.0001 (10)  | 0.0126 (11) | 0.0019 (10)  |
| C24   | 0.0272 (12) | 0.0184 (13) | 0.0165 (13) | 0.0001 (10)  | 0.0126 (11) | 0.0019 (10)  |
| C25   | 0.0272 (12) | 0.0184 (13) | 0.0165 (13) | 0.0001 (10)  | 0.0126 (11) | 0.0019 (10)  |
| C26   | 0.0272 (12) | 0.0184 (13) | 0.0165 (13) | 0.0001 (10)  | 0.0126 (11) | 0.0019 (10)  |
| C27   | 0.0272 (12) | 0.0184 (13) | 0.0165 (13) | 0.0001 (10)  | 0.0126 (11) | 0.0019 (10)  |
| C28   | 0.0272 (12) | 0.0184 (13) | 0.0165 (13) | 0.0001 (10)  | 0.0126 (11) | 0.0019 (10)  |
| C29   | 0.0272 (12) | 0.0184 (13) | 0.0165 (13) | 0.0001 (10)  | 0.0126 (11) | 0.0019 (10)  |
| N1    | 0.0185 (13) | 0.0137 (13) | 0.0167 (16) | -0.0011 (11) | 0.0085 (12) | -0.0044 (12) |
| N2    | 0.0185 (13) | 0.0137 (13) | 0.0167 (16) | -0.0011 (11) | 0.0085 (12) | -0.0044 (12) |
| N3    | 0.0179 (13) | 0.0099 (13) | 0.0175 (12) | -0.0013 (9)  | 0.0089 (11) | -0.0007 (10) |
| N4    | 0.0136 (19) | 0.034 (2)   | 0.0111 (17) | -0.0037 (17) | 0.0031 (15) | -0.0028 (17) |
| N5    | 0.0272 (12) | 0.0184 (13) | 0.0165 (13) | 0.0001 (10)  | 0.0126 (11) | 0.0019 (10)  |
| O1    | 0.0179 (13) | 0.0099 (13) | 0.0175 (12) | -0.0013 (9)  | 0.0089 (11) | -0.0007 (10) |
| O2    | 0.0179 (13) | 0.0099 (13) | 0.0175 (12) | -0.0013 (9)  | 0.0089 (11) | -0.0007 (10) |
| O3    | 0.0179 (13) | 0.0099 (13) | 0.0175 (12) | -0.0013 (9)  | 0.0089 (11) | -0.0007 (10) |
| O4    | 0.0179 (13) | 0.0099 (13) | 0.0175 (12) | -0.0013 (9)  | 0.0089 (11) | -0.0007 (10) |
| O5    | 0.026 (2)   | 0.004 (2)   | 0.018 (2)   | 0.0031 (17)  | 0.0118 (19) | -0.0026 (18) |
| O6    | 0.026 (2)   | 0.004 (2)   | 0.018 (2)   | 0.0031 (17)  | 0.0118 (19) | -0.0026 (18) |
| O7    | 0.0272 (12) | 0.0184 (13) | 0.0165 (13) | 0.0001 (10)  | 0.0126 (11) | 0.0019 (10)  |
| O8    | 0.0272 (12) | 0.0184 (13) | 0.0165 (13) | 0.0001 (10)  | 0.0126 (11) | 0.0019 (10)  |
| O9    | 0.0272 (12) | 0.0184 (13) | 0.0165 (13) | 0.0001 (10)  | 0.0126 (11) | 0.0019 (10)  |
| O10   | 0.0272 (12) | 0.0184 (13) | 0.0165 (13) | 0.0001 (10)  | 0.0126 (11) | 0.0019 (10)  |
| Ni1   | 0.0147 (6)  | 0.0102 (6)  | 0.0145 (6)  | 0.0017 (5)   | 0.0066 (5)  | 0.0011 (5)   |
| Ni2   | 0.0159 (6)  | 0.0105 (6)  | 0.0153 (7)  | -0.0014 (5)  | 0.0078 (5)  | -0.0001 (5)  |

**Table S5.-** Geometric parameters (Å, °) for NiPB5.5.

|         |           |                      |            |
|---------|-----------|----------------------|------------|
| C1—N1   | 1.373 (8) | C20—C21              | 1.372 (9)  |
| C1—C2   | 1.378 (9) | C20—C20 <sup>i</sup> | 1.511 (13) |
| C2—C3   | 1.393 (9) | C21—C22              | 1.375 (8)  |
| C3—C4   | 1.392 (9) | C22—N4               | 1.325 (8)  |
| C3—C8   | 1.485 (9) | C23—O10              | 1.246 (8)  |
| C4—C5   | 1.375 (8) | C23—O9               | 1.282 (8)  |
| C5—N1   | 1.376 (8) | C23—C25              | 1.490 (9)  |
| C6—N2   | 1.336 (8) | C24—N5               | 1.326 (8)  |
| C6—C7   | 1.398 (8) | C24—C25              | 1.416 (9)  |
| C7—C8   | 1.388 (9) | C25—C27              | 1.368 (9)  |
| C8—C9   | 1.390 (8) | C26—N5               | 1.363 (8)  |
| C9—C10  | 1.390 (8) | C26—C28              | 1.393 (10) |
| C10—N2  | 1.337 (8) | C26—C29              | 1.498 (9)  |
| C11—N3  | 1.336 (8) | C27—C28              | 1.372 (9)  |
| C11—C12 | 1.381 (9) | C29—O8               | 1.255 (8)  |
| C11—C17 | 1.503 (9) | C29—O7               | 1.267 (8)  |
| C12—C13 | 1.385 (8) | N1—Ni <sup>i</sup>   | 2.104 (6)  |
| C13—C14 | 1.364 (9) | N2—Ni <sup>ii</sup>  | 2.060 (6)  |
| C14—C15 | 1.389 (9) | N3—Ni <sup>i</sup>   | 2.079 (6)  |
| C14—C16 | 1.524 (9) | N4—Ni <sup>ii</sup>  | 2.100 (6)  |
| C15—N3  | 1.321 (8) | N5—Ni <sup>ii</sup>  | 2.050 (6)  |
| C16—O4  | 1.248 (8) | O1—Ni <sup>i</sup>   | 2.046 (4)  |
| C16—O3  | 1.260 (8) | O2—Ni <sup>ii</sup>  | 2.026 (5)  |
| C17—O2  | 1.248 (7) | O4—Ni <sup>iii</sup> | 2.045 (5)  |
| C17—O1  | 1.274 (7) | O5—Ni <sup>ii</sup>  | 2.112 (4)  |
| C18—N4  | 1.342 (8) | O6—Ni <sup>i</sup>   | 2.085 (4)  |
| C18—C19 | 1.381 (9) | O7—Ni <sup>ii</sup>  | 2.046 (5)  |
| C19—C20 | 1.354 (9) | O9—Ni <sup>iv</sup>  | 2.060 (5)  |

|             |           |                                                    |             |
|-------------|-----------|----------------------------------------------------|-------------|
| N1—C1—C2    | 122.1 (7) | C1—N1—C5                                           | 117.1 (6)   |
| C1—C2—C3    | 120.3 (7) | C1—N1—Ni <sup>i</sup>                              | 121.7 (5)   |
| C4—C3—C2    | 117.8 (7) | C5—N1—Ni <sup>i</sup>                              | 118.7 (4)   |
| C4—C3—C8    | 120.1 (7) | C6—N2—C10                                          | 116.4 (6)   |
| C2—C3—C8    | 122.2 (6) | C6—N2—Ni <sup>ii</sup>                             | 118.4 (5)   |
| C5—C4—C3    | 120.2 (7) | C10—N2—Ni <sup>ii</sup>                            | 125.2 (5)   |
| C4—C5—N1    | 122.3 (7) | C15—N3—C11                                         | 119.5 (7)   |
| N2—C6—C7    | 123.1 (7) | C15—N3—Ni <sup>i</sup>                             | 128.3 (5)   |
| C8—C7—C6    | 119.9 (7) | C11—N3—Ni <sup>i</sup>                             | 112.1 (5)   |
| C7—C8—C9    | 117.1 (7) | C22—N4—C18                                         | 114.2 (6)   |
| C7—C8—C3    | 120.2 (7) | C22—N4—Ni <sup>ii</sup>                            | 121.6 (5)   |
| C9—C8—C3    | 122.5 (6) | C18—N4—Ni <sup>ii</sup>                            | 123.7 (5)   |
| C8—C9—C10   | 118.9 (7) | C24—N5—C26                                         | 118.1 (7)   |
| N2—C10—C9   | 124.5 (7) | C24—N5—Ni <sup>ii</sup>                            | 130.7 (5)   |
| N3—C11—C12  | 121.9 (7) | C26—N5—Ni <sup>ii</sup>                            | 110.6 (5)   |
| N3—C11—C17  | 115.7 (7) | C17—O1—Ni <sup>i</sup>                             | 114.8 (5)   |
| C12—C11—C17 | 122.3 (7) | C17—O2—Ni <sup>ii</sup>                            | 136.9 (5)   |
| C11—C12—C13 | 118.2 (7) | C16—O4—Ni <sup>iii</sup>                           | 123.4 (5)   |
| C14—C13—C12 | 119.7 (7) | C29—O7—Ni <sup>ii</sup>                            | 113.3 (5)   |
| C13—C14—C15 | 118.6 (7) | C23—O9—Ni <sup>iv</sup>                            | 128.5 (5)   |
| C13—C14—C16 | 122.0 (7) | O4 <sup>v</sup> —Ni <sup>i</sup> —O1               | 174.27 (19) |
| C15—C14—C16 | 119.4 (6) | O4 <sup>v</sup> —Ni <sup>i</sup> —N2 <sup>vi</sup> | 89.0 (2)    |
| N3—C15—C14  | 121.9 (7) | O1—Ni <sup>i</sup> —N2 <sup>vi</sup>               | 90.8 (2)    |
| O4—C16—O3   | 126.8 (7) | O4 <sup>v</sup> —Ni <sup>i</sup> —N3               | 93.9 (2)    |
| O4—C16—C14  | 116.4 (6) | O1—Ni <sup>i</sup> —N3                             | 80.4 (2)    |
| O3—C16—C14  | 116.8 (7) | N2 <sup>vi</sup> —Ni <sup>i</sup> —N3              | 90.3 (2)    |

|                          |           |                           |            |
|--------------------------|-----------|---------------------------|------------|
| O2—C17—O1                | 126.0 (7) | O4 <sup>v</sup> —Ni1—O6   | 92.70 (18) |
| O2—C17—C11               | 117.0 (7) | O1—Ni1—O6                 | 93.03 (18) |
| O1—C17—C11               | 117.0 (7) | N2 <sup>vi</sup> —Ni1—O6  | 91.4 (2)   |
| N4—C18—C19               | 124.0 (7) | N3—Ni1—O6                 | 173.2 (2)  |
| C20—C19—C18              | 121.0 (7) | O4 <sup>v</sup> —Ni1—N1   | 89.6 (2)   |
| C19—C20—C21              | 115.4 (6) | O1—Ni1—N1                 | 90.2 (2)   |
| C19—C20—C20 <sup>i</sup> | 122.6 (8) | N2 <sup>vi</sup> —Ni1—N1  | 175.4 (2)  |
| C21—C20—C20 <sup>i</sup> | 121.9 (9) | N3—Ni1—N1                 | 85.5 (2)   |
| C20—C21—C22              | 120.9 (7) | O6—Ni1—N1                 | 93.0 (2)   |
| N4—C22—C21               | 124.4 (7) | O2—Ni2—O7                 | 89.00 (19) |
| O10—C23—O9               | 122.9 (7) | O2—Ni2—N5                 | 95.1 (2)   |
| O10—C23—C25              | 120.7 (7) | O7—Ni2—N5                 | 82.0 (2)   |
| O9—C23—C25               | 116.3 (7) | O2—Ni2—O9 <sup>vii</sup>  | 86.37 (18) |
| N5—C24—C25               | 122.9 (7) | O7—Ni2—O9 <sup>vii</sup>  | 171.9 (2)  |
| C27—C25—C24              | 117.4 (7) | N5—Ni2—O9 <sup>vii</sup>  | 91.7 (2)   |
| C27—C25—C23              | 123.1 (7) | O2—Ni2—N4                 | 173.2 (2)  |
| C24—C25—C23              | 119.2 (7) | O7—Ni2—N4                 | 90.7 (2)   |
| N5—C26—C28               | 121.9 (7) | N5—Ni2—N4                 | 91.6 (2)   |
| N5—C26—C29               | 115.6 (7) | O9 <sup>vii</sup> —Ni2—N4 | 94.7 (2)   |
| C28—C26—C29              | 122.5 (7) | O2—Ni2—O5                 | 80.75 (19) |
| C25—C27—C28              | 120.9 (8) | O7—Ni2—O5                 | 92.09 (19) |
| C27—C28—C26              | 118.5 (7) | N5—Ni2—O5                 | 172.9 (2)  |
| O8—C29—O7                | 124.1 (7) | O9 <sup>vii</sup> —Ni2—O5 | 93.78 (18) |
| O8—C29—C26               | 117.8 (7) | N4—Ni2—O5                 | 92.5 (2)   |
| O7—C29—C26               | 117.9 (7) |                           |            |

**Table S6.-** Fractional atomic coordinates and isotropic or equivalent isotropic displacement parameters (Å<sup>2</sup>) for NiPB1.

| Átomo | x           | y           | z           | Uiso, Å <sup>2</sup> |
|-------|-------------|-------------|-------------|----------------------|
| Ni1   | -0.1199(11) | -0.2202(11) | 0.1750(10)  | 0.119                |
| Ni2   | 0.1623(8)   | -0.2201(12) | 0.0912(8)   | 0.119                |
| N1    | -0.2191(22) | -0.2355(20) | 0.0806(16)  | 0.119                |
| N2    | -0.5298(18) | -0.2701(25) | -0.2332(17) | 0.119                |
| N3    | -0.1088(11) | -0.0286(12) | 0.1770(6)   | 0.119                |
| N4    | 0.2958(16)  | -0.1655(11) | 0.0520(18)  | 0.119                |
| N5    | 0.2112(9)   | -0.3986(15) | 0.1190(10)  | 0.119                |
| O1    | 0.0014(8)   | -0.1972(19) | 0.1207(5)   | 0.119                |
| O10   | 0.3284(12)  | -0.4716(26) | 0.3110(15)  | 0.119                |
| O2    | 0.0847(11)  | -0.0495(19) | 0.0680(6)   | 0.119                |
| O3    | -0.1978(17) | 0.3934(21)  | 0.2170(9)   | 0.119                |
| O4    | -0.2756(10) | 0.2336(28)  | 0.2600(6)   | 0.119                |
| O6    | -0.0940(34) | -0.3972(29) | 0.1716(27)  | 0.119                |
| O7    | 0.1068(8)   | -0.3216(21) | 0.0018(12)  | 0.119                |
| O8    | 0.0983(9)   | -0.5179(28) | -0.0349(13) | 0.119                |
| O9    | 0.2740(16)  | -0.6697(23) | 0.3066(18)  | 0.119                |
| C1    | -0.3024(23) | -0.3053(17) | 0.0752(16)  | 0.119                |
| C2    | -0.3634(19) | -0.3122(13) | 0.0149(17)  | 0.119                |
| C3    | -0.3422(16) | -0.2470(15) | -0.0434(15) | 0.119                |
| C4    | -0.2579(18) | -0.1760(12) | -0.0389(16) | 0.119                |
| C5    | -0.1991(17) | -0.1718(15) | 0.0222(18)  | 0.119                |
| C6    | -0.5390(16) | -0.3461(20) | -0.1802(20) | 0.119                |
| C7    | -0.4791(17) | -0.3402(14) | -0.1181(18) | 0.119                |
| C8    | -0.4059(16) | -0.2526(14) | -0.1091(15) | 0.119                |
| C9    | -0.3959(17) | -0.1737(14) | -0.1637(16) | 0.119                |
| C10   | -0.4589(20) | -0.1866(20) | -0.2233(16) | 0.119                |
| C11   | -0.1618(10) | 0.0602(18)  | 0.2042(6)   | 0.119                |
| C12   | -0.1484(10) | 0.1850(17)  | 0.1922(6)   | 0.119                |
| C13   | -0.0778(11) | 0.2222(18)  | 0.1509(6)   | 0.119                |
| C14   | -0.0213(10) | 0.1335(18)  | 0.1218(6)   | 0.119                |

|     |             |             |             |       |
|-----|-------------|-------------|-------------|-------|
| C15 | -0.0397(10) | 0.0112(17)  | 0.1366(6)   | 0.119 |
| C16 | 0.0211(10)  | -0.0869(18) | 0.1056(6)   | 0.119 |
| C17 | -0.2121(11) | 0.2803(20)  | 0.2256(6)   | 0.119 |
| C18 | 0.2943(10)  | -0.1165(13) | -0.0117(16) | 0.119 |
| C19 | 0.3737(8)   | -0.0519(11) | -0.0319(11) | 0.119 |
| C20 | 0.4564(6)   | -0.0353(6)  | 0.0115(7)   | 0.119 |
| C21 | 0.4588(16)  | -0.0856(9)  | 0.0770(8)   | 0.119 |
| C22 | 0.3771(19)  | -0.1488(9)  | 0.0936(13)  | 0.119 |
| C23 | 0.2507(10)  | -0.4247(20) | 0.1819(11)  | 0.119 |
| C24 | 0.2363(10)  | -0.5394(21) | 0.2114(11)  | 0.119 |
| C25 | 0.1804(11)  | -0.6251(18) | 0.1746(12)  | 0.119 |
| C26 | 0.1386(10)  | -0.5966(14) | 0.1083(12)  | 0.119 |
| C27 | 0.1560(7)   | -0.4813(14) | 0.0821(10)  | 0.119 |
| C28 | 0.1170(7)   | -0.4379(20) | 0.0109(10)  | 0.119 |
| C29 | 0.2848(11)  | -0.5628(23) | 0.2840(11)  | 0.119 |

**Table S7.-** Geometric parameters (Å, °) for NiPB1.

| A1    | A2  | dist    |
|-------|-----|---------|
| Ni1   |     |         |
| Ni1   | O1  | 2.05(2) |
| Ni1   | N3  | 2.08(2) |
| Ni1   | N1  | 2.18(3) |
| Ni1   | N2  | 2.07(3) |
| Ni1   | O4  | 2.04(2) |
| Ni1   | O6  | 1.95(3) |
| Ni2   |     |         |
| Ni2   | O1  | 2.32(2) |
| Ni2   | O2  | 2.16(2) |
| Ni2   | C16 | 2.44(2) |
| Ni2   | O9  | 2.15(4) |
| Ni2   | O7  | 2.13(2) |
| Ni2   | N5  | 2.10(2) |
| Ni2   | N4  | 2.11(3) |
| Bipy2 |     |         |
| N4    | C18 | 1.34(4) |
| N4    | C22 | 1.32(4) |
| C18   | C19 | 1.37(2) |
| C19   | C20 | 1.35(2) |
| C20   | C21 | 1.37(2) |
| C21   | C22 | 1.37(3) |
| C20   | C20 | 1.51(1) |
| Bipy1 |     |         |
| N1    | C1  | 1.36(4) |
| N1    | C5  | 1.37(4) |
| C1    | C2  | 1.37(4) |
| C2    | C3  | 1.38(4) |
| C3    | C4  | 1.38(3) |
| C4    | C5  | 1.37(4) |

|             |     |         |
|-------------|-----|---------|
| C3          | C8  | 1.47(4) |
| C6          | C7  | 1.39(5) |
| C7          | C8  | 1.38(3) |
| C8          | C9  | 1.37(4) |
| C9          | C10 | 1.38(4) |
| N2          | C10 | 1.32(4) |
| N2          | C6  | 1.33(5) |
| <b>PDC1</b> |     |         |
| C11         | C12 | 1.39(3) |
| C12         | C13 | 1.36(2) |
| C13         | C14 | 1.38(2) |
| C14         | C15 | 1.38(3) |
| C15         | C16 | 1.50(2) |
| N3          | C11 | 1.34(2) |
| N3          | C15 | 1.34(2) |
| O1          | C16 | 1.27(3) |
| O2          | C16 | 1.25(2) |
| C12         | C17 | 1.53(2) |
| O3          | C17 | 1.26(3) |
| O4          | C17 | 1.24(2) |
| <b>PDC2</b> |     |         |
| C23         | C24 | 1.39(3) |
| C24         | C25 | 1.36(3) |
| C25         | C26 | 1.39(3) |
| C26         | C27 | 1.38(2) |
| C27         | C28 | 1.50(3) |
| N5          | C23 | 1.31(3) |
| N5          | C27 | 1.34(2) |
| O7          | C28 | 1.28(3) |
| O8          | C28 | 1.25(3) |
| C24         | C29 | 1.52(3) |
| O9          | C29 | 1.25(4) |
| O10         | C29 | 1.24(3) |

| A1         | A2  | A3 | angle    |
|------------|-----|----|----------|
| <b>Ni1</b> |     |    |          |
| N2         | Ni1 | O6 | 83(2)    |
| O6         | Ni1 | N1 | 90(2)    |
| N1         | Ni1 | N3 | 97(1)    |
| N3         | Ni1 | N2 | 90(1)    |
| O4         | Ni1 | N2 | 82(1)    |
| O4         | Ni1 | O6 | 85(1)    |
| O4         | Ni1 | N1 | 95(1)    |
| O4         | Ni1 | N3 | 106.7(9) |



|            |     |    |          |
|------------|-----|----|----------|
| O1         | Ni1 | N2 | 90(1)    |
| O1         | Ni1 | O6 | 87(1)    |
| O1         | Ni1 | N1 | 93(1)    |
| O1         | Ni1 | N3 | 80.1(8)  |
| N1         | Ni1 | N2 | 172(1)   |
| N3         | Ni1 | O6 | 165(2)   |
| O1         | Ni1 | O4 | 169(1)   |
| <b>Ni2</b> |     |    |          |
| O9         | Ni2 | N5 | 85(1)    |
| N5         | Ni2 | O7 | 79.2(8)  |
| O7         | Ni2 | O2 | 98.2(8)  |
| O2         | Ni2 | O1 | 60.3(6)  |
| O2         | Ni2 | O9 | 97(1)    |
| O1         | Ni2 | O9 | 93.5(9)  |
| O1         | Ni2 | O7 | 88.8(8)  |
| O1         | Ni2 | N5 | 108.7(8) |
| O2         | Ni2 | N4 | 96.0(9)  |
| O7         | Ni2 | N4 | 96(1)    |
| N4         | Ni2 | O9 | 88(1)    |
| N5         | Ni2 | N4 | 95.0(9)  |
| O9         | Ni2 | O7 | 164(1)   |
| N5         | Ni2 | O2 | 168.9(9) |
| N4         | Ni2 | O1 | 156(1)   |
| C16        | Ni2 | N5 | 138.7(8) |
| C16        | Ni2 | N4 | 125.8(9) |

---

i <http://www.chem.gla.ac.uk/~louis/software/platon/>
